# Supplementary material
Source: PubMed Central journal article supplement (PMC6640972)
Supplement: ao6b00431_si_001.pdf [file ao6b00431_si_001.pdf]

# Supporting Information

## Nitrogen-Rich Tetranuclear Metal Complex as a New Structural Motif for Energetic Materials

*Jian-Gang Xu,<sup>†, ‡</sup> Shuai-Hua Wang,<sup>†</sup> Ming-Jian Zhang,<sup>†</sup> Cai Sun,<sup>†, ‡</sup> Yu Xiao,<sup>§</sup> Rong Li,<sup>†, ‡</sup> Fa-  
Kun Zheng,<sup>\*†</sup> Guo-Cong Guo,<sup>\*†</sup> and Jin-Shun Huang<sup>†</sup>*

<sup>†</sup> State Key Laboratory of Structural Chemistry, Fujian Institute of Research on the Structure of Matter, Chinese Academy of Sciences, Fuzhou, Fujian 350002, P. R. China

<sup>‡</sup> University of Chinese Academy of Sciences, Beijing 100039, P. R. China

<sup>§</sup> School of Pharmaceutical Science, Harbin Medical University, Harbin 150086, P. R. China

**Index:**

**1. Tables .....S3**

**2. Graphics.....S9**

**3. References.....S10**

Supporting Information - For Review Only - Not for Publication

## 1. Tables

**Table S1.** Selected bond distances (Å) and bond angles (°).

| Compound 1        |           |                       |            |
|-------------------|-----------|-----------------------|------------|
| Zn(1)–O(2W)       | 2.085(2)  | Zn(2)–O(1W)           | 2.0716(19) |
| Zn(1)–N(10)       | 2.104(2)  | Zn(2)–N(29)           | 2.133(2)   |
| Zn(1)–N(25)       | 2.117(2)  | Zn(2)–O(3W)           | 2.163(2)   |
| Zn(1)–N(19)       | 2.191(2)  | Zn(2)–N(20)           | 2.167(2)   |
| Zn(1)–O(4W)       | 2.195(2)  | Zn(2)–N(15)#1         | 2.185(2)   |
| Zn(1)–N(26)       | 2.215(2)  | Zn(2)–N(16)#1         | 2.211(2)   |
|                   |           |                       |            |
| O(2W)–Zn(1)–N(10) | 91.51(8)  | O(1W)–Zn(2)–N(29)     | 93.16(8)   |
| O(2W)–Zn(1)–N(25) | 92.11(8)  | O(1W)–Zn(2)–O(3W)     | 175.15(8)  |
| N(10)–Zn(1)–N(25) | 169.98(8) | N(29)–Zn(2)–O(3W)     | 86.76(8)   |
| O(2W)–Zn(1)–N(19) | 90.93(8)  | O(1W)–Zn(2)–N(20)     | 92.14(7)   |
| N(10)–Zn(1)–N(19) | 93.68(7)  | N(29)–Zn(2)–N(20)     | 94.11(7)   |
| N(25)–Zn(1)–N(19) | 95.61(8)  | O(3W)–Zn(2)–N(20)     | 92.70(8)   |
| O(2W)–Zn(1)–O(4W) | 98.10(9)  | O(1W)–Zn(2)–N(15)#1   | 97.15(8)   |
| N(10)–Zn(1)–O(4W) | 86.38(8)  | N(29)–Zn(2)–N(15)#1   | 166.86(8)  |
| N(25)–Zn(1)–O(4W) | 83.86(9)  | O(3W)–Zn(2)–N(15)#1   | 82.28(8)   |
| N(19)–Zn(1)–O(4W) | 170.97(9) | N(20)–Zn(2)–N(15)#1   | 93.63(7)   |
| O(2W)–Zn(1)–N(26) | 166.07(8) | O(1W)–Zn(2)–N(16)#1   | 88.86(8)   |
| N(10)–Zn(1)–N(26) | 101.30(7) | N(29)–Zn(2)–N(16)#1   | 96.07(8)   |
| N(25)–Zn(1)–N(26) | 76.18(7)  | O(3W)–Zn(2)–N(16)#1   | 86.33(8)   |
| N(19)–Zn(1)–N(26) | 82.87(9)  | N(20)–Zn(2)–N(16)#1   | 169.70(8)  |
| O(4W)–Zn(1)–N(26) | 88.26(9)  | N(15)#1–Zn(2)–N(16)#1 | 76.08(7)   |
|                   |           |                       |            |
| Compound 2        |           |                       |            |
| Mn(1)–O(1W)       | 2.144(5)  | Mn(2)–O(3W)           | 2.158(5)   |
| Mn(1)–O(2W)       | 2.197(5)  | Mn(2)–O(4W)           | 2.201(6)   |

|                       |            |                   |            |
|-----------------------|------------|-------------------|------------|
| Mn(1)–N(20)#1         | 2.246(5)   | Mn(2)–N(10)       | 2.214(5)   |
| Mn(1)–N(15)           | 2.257(5)   | Mn(2)–N(24)       | 2.240(5)   |
| Mn(1)–N(29)#1         | 2.265(5)   | Mn(2)–N(23)       | 2.262(5)   |
| Mn(1)–N(16)           | 2.277(5)   | Mn(2)–N(19)       | 2.287(5)   |
| O(1W)–Mn(1)–O(2W)     | 171.11(17) | O(3W)–Mn(2)–O(4W) | 99.7(2)    |
| O(1W)–Mn(1)–N(20)#1   | 89.32(18)  | O(3W)–Mn(2)–N10   | 91.99(19)  |
| O(2W)–Mn(1)–N(20)#1   | 86.14(19)  | N(10)–Mn(2)–O(4W) | 88.1(2)    |
| O(1W)–Mn(1)–N(15)     | 99.61(18)  | O(3W)–Mn(2)–N(24) | 92.93(18)  |
| O(2W)–Mn(1)–N(15)     | 84.17(19)  | N(10)–Mn(2)–N(24) | 85.5(2)    |
| N(20)#1–Mn(1)–N(15)   | 169.13(19) | O(4W)–Mn(2)–N(24) | 172.5(2)   |
| O(1W)–Mn(1)–N(29)#1   | 94.32(17)  | O(3W)–Mn(2)–N(23) | 163.91(18) |
| O(2W)–Mn(1)–N(29)#1   | 93.36(18)  | N(10)–Mn(2)–N(23) | 88.7(2)    |
| N(20)#1–Mn(1)–N(29)#1 | 90.56(17)  | O(4W)–Mn(2)–N(23) | 102.03(18) |
| N(15)–Mn(1)–N(29)#1   | 94.91(17)  | N(24)–Mn(2)–N(23) | 73.97(17)  |
| O(1W)–Mn(1)–N(16)     | 87.53(17)  | O(3W)–Mn(2)–N(19) | 90.3(2)    |
| O(2W)–Mn(1)–N(16)     | 85.83(18)  | N(10)–Mn(2)–N(19) | 169.8(2)   |
| N(20)#1–Mn(1)–N(16)   | 100.84(17) | O(4W)–Mn(2)–N(19) | 89.42(17)  |
| N(15)–Mn(1)–N(16)     | 73.58(16)  | N(24)–Mn(2)–N(19) | 96.27(18)  |
| N(29)#1–Mn(1)–N(16)   | 168.48(17) | N(23)–Mn(2)–N(19) | 82.12(19)  |

Symmetry code: #1  $-x + 1, -y + 1, -z + 1$ .

**Table S2.** Intermolecular  $\pi$ - $\pi$  interaction distances (Å).

| $\pi$ - $\pi$ interactions | Plane A                      | Plane B                          | Distance   |
|----------------------------|------------------------------|----------------------------------|------------|
| <b>Compound 1</b>          |                              |                                  |            |
| Cg(A)•••Cg(B)              | N16, N17, N18, N19, C15      | N26, N27, N28, N29, C25          | 3.6005(15) |
| Cg(A)•••Cg(B)              | N16A, N17A, N18A, N19A, C15A | N26 A, N27 A, N28 A, N29 A, C25A | 3.6005(15) |
| Cg(A)•••Cg(B)              | N10, N11, N12, N13, C11      | N21C, N22C, N23C, N24C, C21C     | 3.9330(15) |
| Cg(A)•••Cg(B)              | N10B, N11B, N12B, N13B, C11B | N21A, N22A, N23A, N24A, C21A     | 3.6275(15) |
| Cg(A)•••Cg(B)              | N14, C12, C14, N15, C13      | N24C, C22C, C24C, N25C, C23C     | 3.9817(16) |
| Cg(A)•••Cg(B)              | N14B, C12B, C14B, N15B, C13B | N24A, C22A, C24A, N25A, C23A     | 3.8870(16) |

| Compound 2    |                              |                              |          |
|---------------|------------------------------|------------------------------|----------|
| Cg(A)•••Cg(B) | N16, N17, N18, N19, C15 N20, | N20, N21, N22, N23, C21      | 3.633(5) |
| Cg(A)•••Cg(B) | N16A, N17A, N18A, N19A, C15A | N20A, N21A, N22A, N23A, C21A | 3.633(5) |
| Cg(A)•••Cg(B) | N10, N11, N12, N13, C11      | N26C, N27C, N28C, N29C, C25C | 3.957(5) |
| Cg(A)•••Cg(B) | N10B, N11B, N12B, N13B, C11B | N26A, N27A, N28A, N29A, C25A | 3.659(5) |
| Cg(A)•••Cg(B) | N14, C12, C14, N15, C13      | N24C, C22C, C24C, N25C, C23C | 4.013(5) |
| Cg(A)•••Cg(B) | N14B, C12B, C14B, N15B, C13B | N24A, C22A, C24A, N25A, C23A | 3.832(5) |

Symmetry codes: (A)  $1 - x, 1 - y, 1 - z$ . (B)  $1.5 - x, -0.5 + y, 0.5 - z$ , (C)  $-0.5 + x, 1.5 - y, -0.5 + z$ .

**Table S3.** Hydrogen bond distances (Å) and bond angles (°).

| Donor–H•••Acceptor     | d(D–H)   | d(H•••A) | d(D•••A)  | ∠D---H•••A |
|------------------------|----------|----------|-----------|------------|
| Compound 1             |          |          |           |            |
| O1W–H1WA•••N28         | 0.77(3)  | 2.09(3)  | 2.828(3)  | 162(3)     |
| O1W–H1WB•••N13         | 0.95(5)  | 2.02(5)  | 2.886(3)  | 151(4)     |
| O2W–H2WA•••N22         | 0.77(5)  | 2.10(5)  | 2.860(3)  | 171(5)     |
| O2W–H2WB•••N11         | 0.74(9)  | 2.09(10) | 2.824(10) | 171(7)     |
| N24–H5•••N27           | 0.87(3)  | 2.11(3)  | 2.943(3)  | 161(3)     |
| O3W–H3WA•••N12         | 0.82(6)  | 2.04(6)  | 2.854(3)  | 177(7)     |
| O3W–H3WB•••N17 (Intra) | 0.84(5)  | 2.26(5)  | 3.091(3)  | 178(6)     |
| O4W–H4WA•••N21         | 0.80(4)  | 2.19(4)  | 2.951(3)  | 158(4)     |
| O4W–H4WA•••N22         | 0.80(4)  | 2.57(3)  | 3.134(3)  | 129(3)     |
| Compound 2             |          |          |           |            |
| O1W–H1WA•••N2          | 0.84(3)  | 2.07(5)  | 2.830(7)  | 150(5)     |
| O1W–H1WB•••N13         | 0.85(5)  | 2.13(5)  | 2.913(7)  | 154(5)     |
| O2W–H2WA•••N12         | 0.85(4)  | 2.01(4)  | 2.832(7)  | 163(6)     |
| O2W–H2WB•••N17(Intra)  | 0.84(6)  | 2.32(6)  | 3.139(7)  | 166(5)     |
| O3W–H3WA•••N27         | 0.77(8)  | 2.12(8)  | 2.883(8)  | 170(8)     |
| O3W–H3WB•••N11         | 0.87(11) | 1.94(11) | 2.760(7)  | 156(11)    |
| O4W–H4WA•••N27         | 0.71(12) | 2.56(13) | 3.116(7)  | 136(13)    |
| O4W–H4WB•••N27         | 0.90(8)  | 2.29(8)  | 3.182(8)  | 169(7)     |
| N14–H14A•••N18         | 0.98(6)  | 1.94(7)  | 2.921(7)  | 175(6)     |

Symmetry code: (A)  $1 - x, 1 - y, 1 - z$ .

**Table S4.** Calculated parameters used in the detonation reactions for compounds **1** and **2**

|          | Compounds  | ZnO/MnO <sub>2</sub> | H <sub>2</sub> O | NH <sub>3</sub> | N <sub>2</sub> | C        | $\Delta E_{det}$ | $\Delta E_{det}$     | $\Delta H_{det}$     | $\Delta H_{det}$      |
|----------|------------|----------------------|------------------|-----------------|----------------|----------|------------------|----------------------|----------------------|-----------------------|
|          | hartree    | hartree              | hartree          | hartree         | hartree        | hartree  | hartree          | kcal·g <sup>-1</sup> | kcal·g <sup>-1</sup> | kcal·cm <sup>-3</sup> |
| <b>1</b> | -1118.4725 | -302.2548            | -76.3787         | -56.4983        | -109.4493      | -37.7441 | 1.5075           | 3.1158               | 3.558                | 7.499                 |
| <b>2</b> | -995.8487  | -254.7155            | -76.3787         | -56.4983        | -109.4493      | -37.7441 | 1.6195           | 3.4668               | 3.953                | 7.780                 |

1 hartree = 627.51 Kcal·mol<sup>-1</sup>

**Notes:**

**Heats of detonation for compounds 1 and 2.** All of the calculations were completed in the Materials Studio 6.0 package. Density functional theory (DFT) was used to compute the energy of detonation ( $\Delta H_{det}$ ), from which  $\Delta E_{det}$  is estimated by using a linear correlation equations ( $\Delta H_{det} = 1.127 \Delta E_{det} + 0.046$ ,  $r = 0.968$ ). As in the reported literature<sup>[1]</sup>, the DFT calculations for energetic materials were performed with the code DMOI3<sup>[2]</sup> under 3D periodic boundary conditions employing the Monkhorst-Pack multiple K-point sampling of the Brillouin zone<sup>[3]</sup> and the Perdew-BeckeEzerhoff (PBE) exchange-correlation function.<sup>[4]</sup> The complete detonation reactions are described by equations 1 and 2.

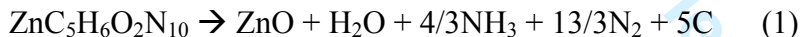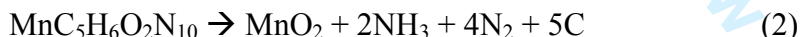

**Table S5.** Comparison of nitrogen content, heat of detonation, detonation velocity and detonation pressure of some reported energetic MOFs with **1** and **2**

| explosive                                                                        | $N^a$ | $\Delta H_{det}^b$ | $D^c$ | $P^d$ | Ref                                                                |
|----------------------------------------------------------------------------------|-------|--------------------|-------|-------|--------------------------------------------------------------------|
| <b>2</b>                                                                         | 47.75 | 3.953              | 9.064 | 38.18 | This work                                                          |
| <b>1</b>                                                                         | 46.12 | 3.558              | 9.610 | 44.57 | This work                                                          |
| CHP                                                                              | 33.49 | 1.250              | 8.225 | 31.73 | <i>J. Am. Chem. Soc.</i> <b>2012</b> , <i>134</i> , 1422–1425      |
| NHP                                                                              | 33.49 | 1.370              | 9.184 | 39.69 | <i>J. Am. Chem. Soc.</i> <b>2012</b> , <i>134</i> , 1422–1425      |
| CHHP                                                                             | 23.58 | 0.750              | 6.205 | 17.96 | <i>Chem. Eur. J.</i> <b>2013</b> , <i>19</i> , 1706–1711           |
| ZnHHP                                                                            | 23.61 | 0.700              | 7.016 | 23.58 | <i>Chem. Eur. J.</i> <b>2013</b> , <i>19</i> , 1706–1711           |
| CuATRZ                                                                           | 53.35 | 3.618              | 9.160 | 35.68 | <i>Angew. Chem. Int. Ed.</i> <b>2013</b> , <i>52</i> , 14031–14035 |
| AgATRZ                                                                           | 43.76 | 1.381              | 7.773 | 29.70 | <i>Angew. Chem. Int. Ed.</i> <b>2013</b> , <i>52</i> , 14031–14035 |
| CoBTA                                                                            | 59.85 | 2.658              | 8.657 | 32.18 | <i>Chem. Eur. J.</i> <b>2014</b> , <i>20</i> , 1–6                 |
| [Pb(Htztr) <sub>2</sub> (H <sub>2</sub> O)] <sub>n</sub>                         | 39.4  | 1.36               | 7.72  | 31.6  | <i>J. Mater. Chem. A</i> , <b>2014</b> , <i>2</i> , 11958–11965    |
| [Pb(H <sub>2</sub> tztr)(O)] <sub>n</sub>                                        | 27.2  | 0.26               | 8.12  | 40.1  | <i>J. Mater. Chem. A</i> , <b>2014</b> , <i>2</i> , 11958–11965    |
| [Cu(Htztr) <sub>2</sub> (H <sub>2</sub> O) <sub>2</sub> ] <sub>n</sub>           | 52.72 | 2.128              | 8.18  | 30.57 | <i>Green Chem.</i> , <b>2015</b> , <i>17</i> , 831–836             |
| [Cu(tztr)·H <sub>2</sub> O] <sub>n</sub>                                         | 45.23 | 1.322              | 7.92  | 31.99 | <i>Green Chem.</i> , <b>2015</b> , <i>17</i> , 831–836             |
| [Cu(Htztr)] <sub>n</sub>                                                         | 49.08 | 3.958              | 10.40 | 56.48 | <i>Green Chem.</i> , <b>2015</b> , <i>17</i> , 831–836             |
| [Cu <sub>4</sub> Na(Mtta) <sub>5</sub> (CH <sub>3</sub> CN)] <sub>n</sub>        | 40.08 | 2.37               | 7.23  | 24.4  | <i>Dalton Trans.</i> , <b>2015</b> , <i>44</i> , 2333–2339         |
| [Cu <sub>3</sub> (MA) <sub>2</sub> (N <sub>3</sub> ) <sub>3</sub> ] <sub>n</sub> | 47.55 | 2.47               | 8.47  | 35.32 | <i>Chem. Eur. J.</i> <b>2015</b> , <i>21</i> , 1–6                 |

<sup>a</sup> Nitrogen content. <sup>b</sup> The heat of detonation. <sup>c</sup> Detonation velocity. <sup>d</sup> Detonation pressure.

[Pb(Htztr)<sub>2</sub>(H<sub>2</sub>O)]<sub>n</sub>: PbC<sub>6</sub>H<sub>6</sub>N<sub>14</sub>O,  $M_r = 497.45$ ; [Pb(H<sub>2</sub>tztr)(O)]<sub>n</sub>: PbC<sub>3</sub>H<sub>3</sub>N<sub>7</sub>O,  $M_r = 360.31$ ; [Cu(Htztr)<sub>2</sub>(H<sub>2</sub>O)<sub>2</sub>]<sub>n</sub>: CuC<sub>6</sub>H<sub>8</sub>N<sub>14</sub>O<sub>2</sub>,  $M_r = 371.8$ ; [Cu(tztr)H<sub>2</sub>O]<sub>n</sub>: CuC<sub>3</sub>H<sub>3</sub>N<sub>7</sub>O,  $M_r = 216.65$ ; [Cu<sub>4</sub>Na(Mtta)<sub>5</sub>(CH<sub>3</sub>CN)]<sub>n</sub>: Cu<sub>4</sub>NaN<sub>21</sub>C<sub>12</sub>H<sub>18</sub>,  $M_r = 735$ ; [Cu<sub>3</sub>(MA)<sub>2</sub>(N<sub>3</sub>)<sub>3</sub>]<sub>n</sub>: C<sub>3</sub>H<sub>6</sub>Cu<sub>3</sub>N<sub>15</sub>,  $M_r = 442.85$ . The other reported energetic MOFs have been illustrated in the manuscript.

**Notes:**

**Detonation properties for compounds 1 and 2.** Detonation performance of the related energetic materials (**1** and **2**) here was evaluated by the empirical Kamlet formula, as

$$D = 1.01 \Phi^{1/2} (1 + 1.30\rho)$$

$$P = 1.558 \Phi \rho^2$$

$$\Phi = 31.68 N(MQ)^{1/2}$$

$$Q = -[\Delta H_f(\text{denotation products}) - \Delta H_f(\text{explosive})]/\text{formula weight of explosive}$$

where  $D$  represents detonation velocity ( $\text{km}\cdot\text{s}^{-1}$ ) and  $P$  is detonation pressure (GPa),  $\rho$  is the density of explosive ( $\text{g}\cdot\text{cm}^{-3}$ ).  $\Phi$ ,  $N$ ,  $M$  and  $Q$  are characteristic parameters of an explosive.  $N$  is the moles of detonation gases per gram of explosive,  $M$  is the average molecular weight of these gases and  $Q$  is the heat of detonation ( $\text{kJ}\cdot\text{g}^{-1}$ ). The formation of metal oxides as solid was assumed to be governed by the deficiency of oxygen.

For 1

$$\rho = 2.108 \text{ g}\cdot\text{cm}^{-3}$$

$$Q = \Delta H_{det} = 3.5576 \text{ Kcal}\cdot\text{g}^{-1} = 14870.8 \text{ J}\cdot\text{g}^{-1}$$

$$N = 20/(3 \times 303.6) = 0.0220 \text{ mol}\cdot\text{g}^{-1}$$

$$M = (18.02 \times 3 + 17.03 \times 4 + 28.01 \times 13)/20 = 24.32 \text{ g}\cdot\text{mol}^{-1}$$

$$P = 1.55 \times (2.108)^2 \times [0.0220 \times (24.32 \times 3557.6)]^{1/2} = 1.55 \times (2.108)^2 \times 6.471 = 44.57 \text{ GPa}$$

$$D = 1.01 \times (6.471)^{1/2} \times (1 + 1.30 \times 2.108) = 9.610 \text{ km}\cdot\text{s}^{-1}$$

For 2

$$\rho = 1.968 \text{ g}\cdot\text{cm}^{-3}$$

$$Q = \Delta H_{det} = 3.9531 \text{ Kcal}\cdot\text{g}^{-1} = 16523.958 \text{ J}\cdot\text{g}^{-1}$$

$$N = 6/293.15 = 0.0205 \text{ mol}\cdot\text{g}^{-1}$$

$$M = (17.03 \times 2 + 28.01 \times 4)/6 = 24.35 \text{ g}\cdot\text{mol}^{-1}$$

$$P = 1.55 \times (1.968)^2 \times [0.0205 \times (24.35 \times 3953.1)]^{1/2} = 1.55 \times (1.968)^2 \times 6.36 = 38.18 \text{ GPa}$$

$$D = 1.01 \times (6.36)^{1/2} \times (1 + 1.30 \times 1.968) = 9.064 \text{ km}\cdot\text{s}^{-1}$$



## 2. Graphics

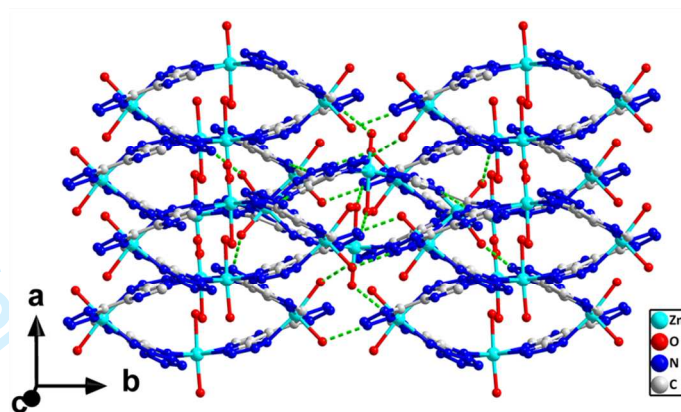

**Figure S1.** Schematic representation of 0-D to 3-D supramolecular architecture *via* hydrogen bonds in **1**

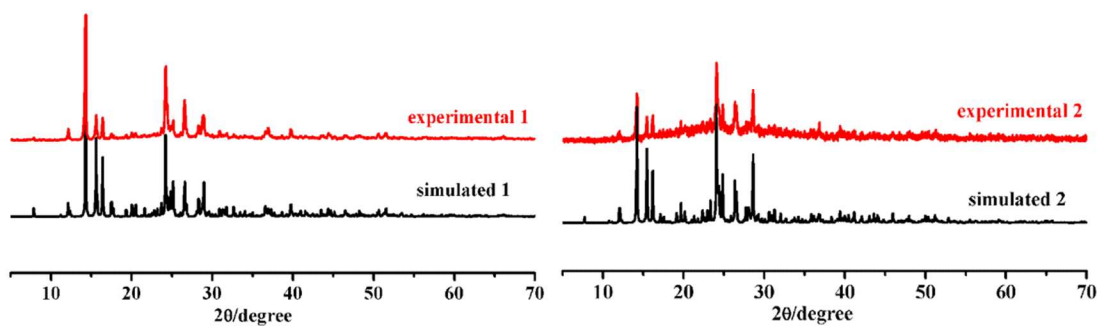

**Figure S2.** Powdered X-ray diffraction (PXRD) patterns of **1** and **2**

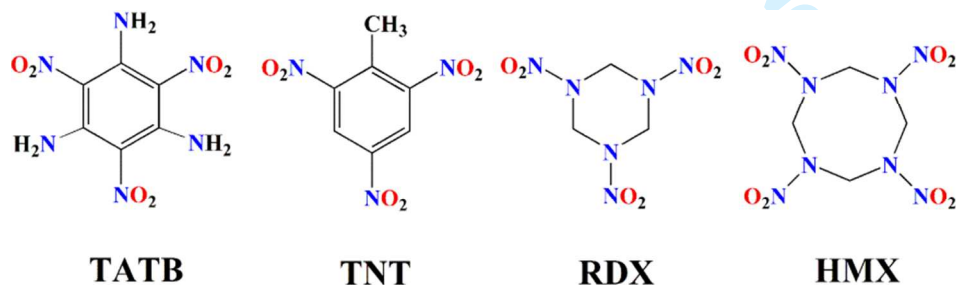

**Figure S3.** The structures of four classical explosive materials: triaminotrinitrobenzene (TATB), trinitrotoluene (TNT), cyclotrimethylenetrinitramine (RDX), cyclotetramethylenetetranitramine (HMX).

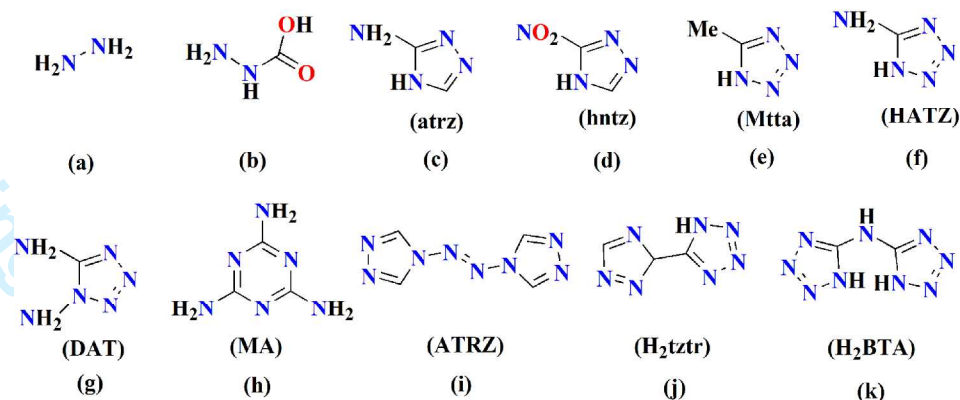

**Figure S4.** Selected nitrogen-rich ligands used in the synthesis of the reported 1D, 2D and 3D energetic MOFs: (a) hydrazine, (b) hydrazinecarboxylate, (c) 3-amino-1*H*-1,2,4-triazole (atrz), (d) 3-nitro-1*H*-1,2,4-triazole (Hntz), (e) 5-methyltetrazole (Mtta), (f) 5-aminotetrazole (HATZ), (g) 1,5-diaminotetrazole (DAT), (h) melamine (MA), (i) 4,4'-azo-1,2,4-triazole (ATRZ), (j) 3-(tetrazole-5-yl)triazole (H<sub>2</sub>tztr), (k) N,N-bis(1*H*-tetrazole-5-yl)-amine (H<sub>2</sub>BTA).

### 3. References:

- [1] (a) Bushuyev, O. S.; Brown, P.; Maiti, A.; Gee, R. H.; Peterson,; Weeks, G. R. B. L.; Hope-Weeks, L. J. *J. Am. Chem. Soc.* **2012**, 134, 1422–1425. (b) Zhang, S.; Liu, X.; Yang, Q.; Su, Z.; Gao, W.; Wei, Q.; Xie, G.; Chen S.; Gao, S. *Chem.–Eur. J.* **2014**, 20, 7906–7910.
- [2] Delley, B. *J. Chem. Phys.* **1990**, 92, 508–517.
- [3] Monkhorst, H. J.; Pack, J. D. *Phys. Rev. B* **1976**, 13, 5188–5192.
- [4] Perdew, J. P.; Burke, K.; Ernzerhof, M. *Phys. Rev. Lett.*, **1996**, 77, 3865–3868.
